# Supplementary material
Source: publisher site journal article supplement (https://www.dovepress.com/article/418093)
Supplement: Supplementary file 1 [file get_supplementary_file.php]

**Supplemental Materials**

**A Novel Clinical Tool to Detect Severe Obstructive Sleep Apnea**

**Running Head:** A novel Tool to Detect Severe OSA

Yanqing Ye1,3* , Ze-Lin Yan2* , Yuan-shou Huang3* , Li Li2 , Shi-Ming Wang1 , Xiaoxing Huang1 , Jing-Meng Zhou1, Li-Yi Chen4 , Chun-Quan Ou2 , Huai-Hong Chen1

1Department of Otorhinolaryngology-Head and Neck Surgery, Nan fang Hospital, Southern Medical University, Guangzhou, People’s Republic of China;

2State Key Laboratory of Organ Failure Research, Department of Biostatistics, Guangdong Provincial Key Laboratory of Tropical Disease Research, School of Public Health, Southern Medical University, Guangzhou, People’s Republic of China;

3Otolaryngology department, Foshan Nan hai District People's Hospital, Foshan, People’s Republic of China;

4Yidu Cloud Technology Ltd, Beijing, People’s Republic of China;

*These authors contributed equally to this work

Correspondence: Huai-Hong Chen, Department of Otorhinolaryngology Head and Neck Surgery, Nan fang Hospital, Southern Medical University, Guangzhou, People’s Republic of China; Tel 18620991226, Email [chh19760306@163.com](mailto:chh19760306@163.com). Chun-Quan Ou, Department of Biostatistics, Guangdong Provincial Key Laboratory of Tropical Disease Research, School of Public Health, Southern Medical University, Guangzhou, People’s Republic of China, Tel 18565132514, Email ouchunquan@hotmail.com


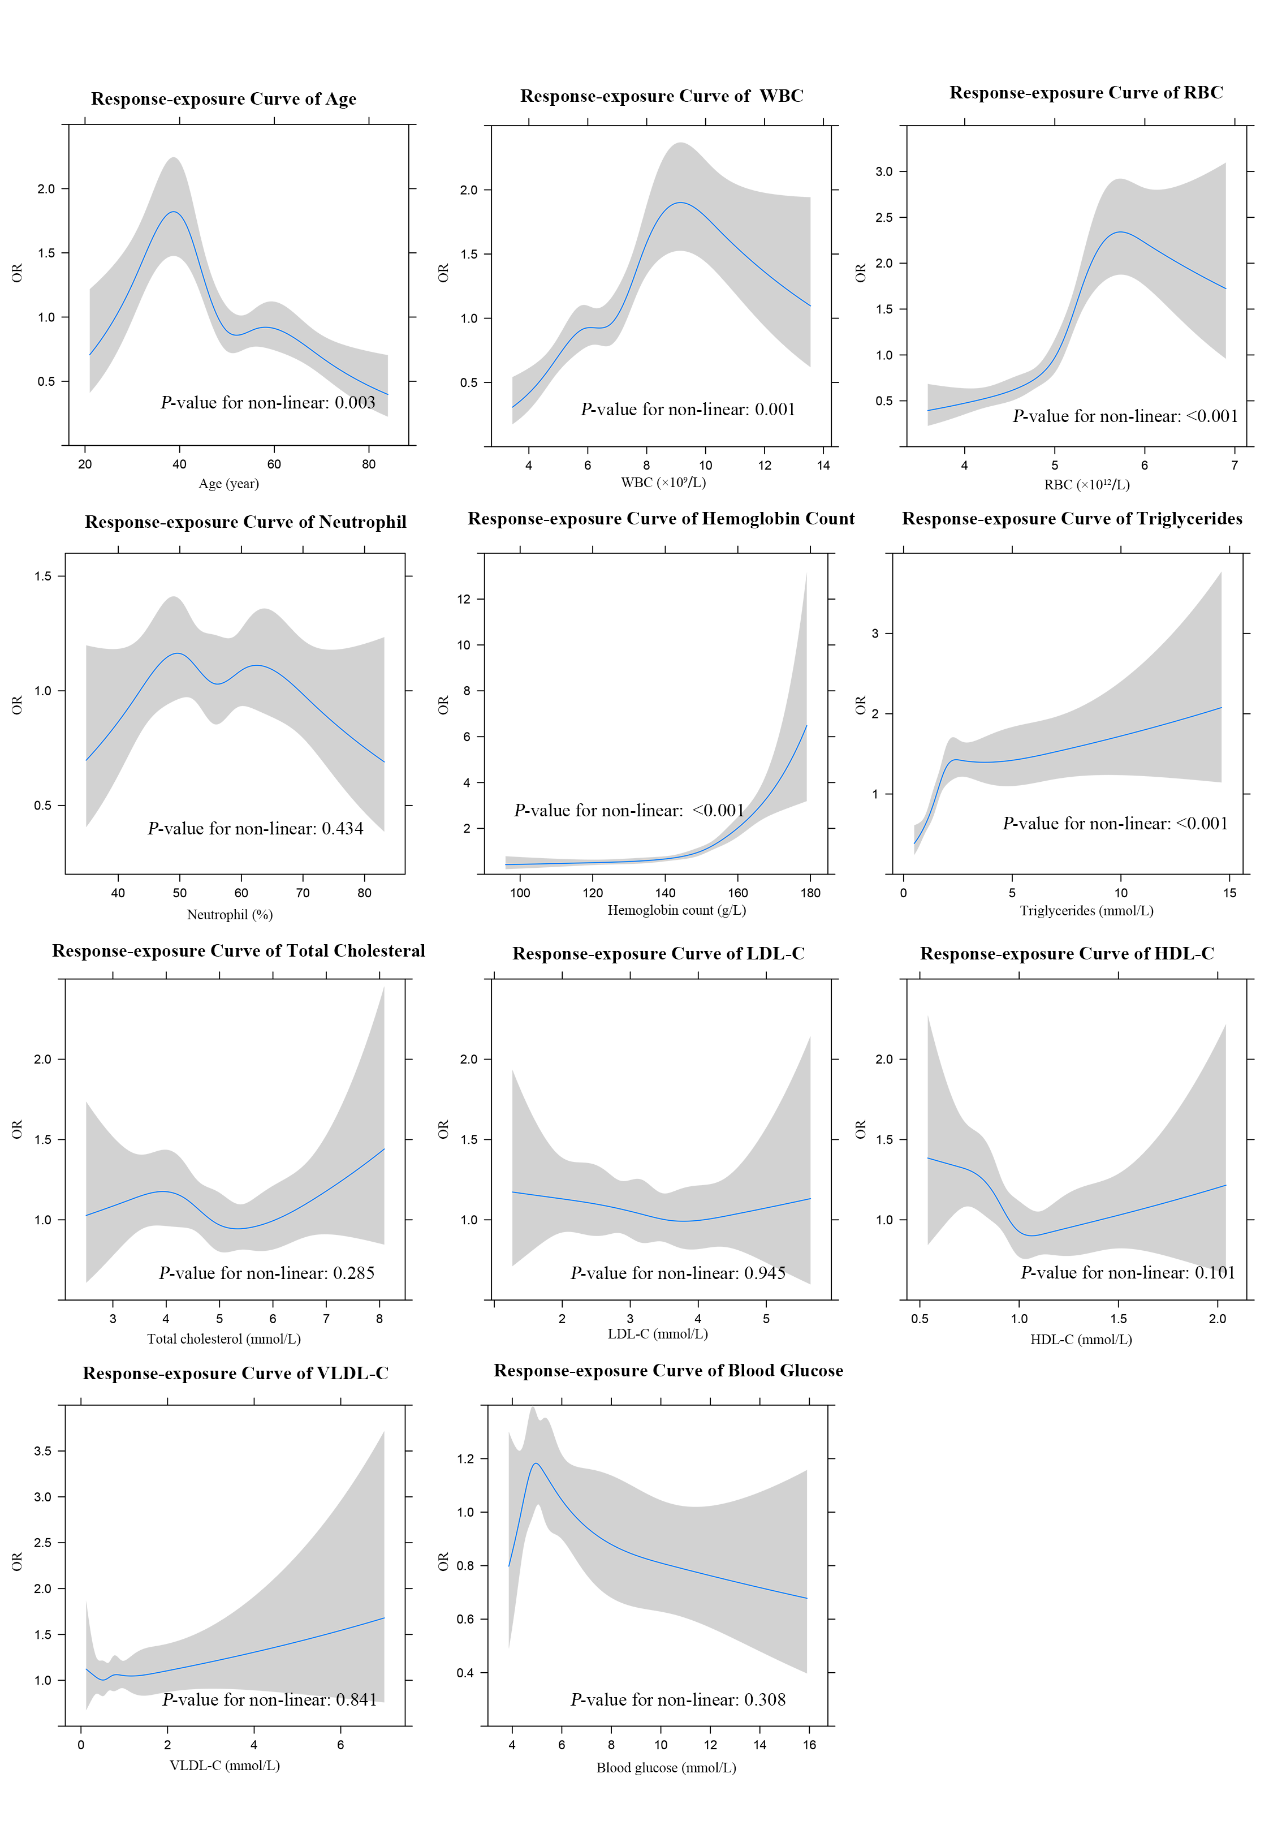


e Figure 1. The exposure-response curve for all continuous variables. The restricted cubic spline is used to put the variable of interest into the univariate model. The *P*-value refers to the *P*-value of the non-linear term for variable of interest in the model. WBC , white blood cell count; RBC , red blood cell count; HDL-C , high density lipoprotein cholesterol; LDL-C , low density lipoprotein cholesterol; VLDL-C , very low density lipoprotein cholesterol.


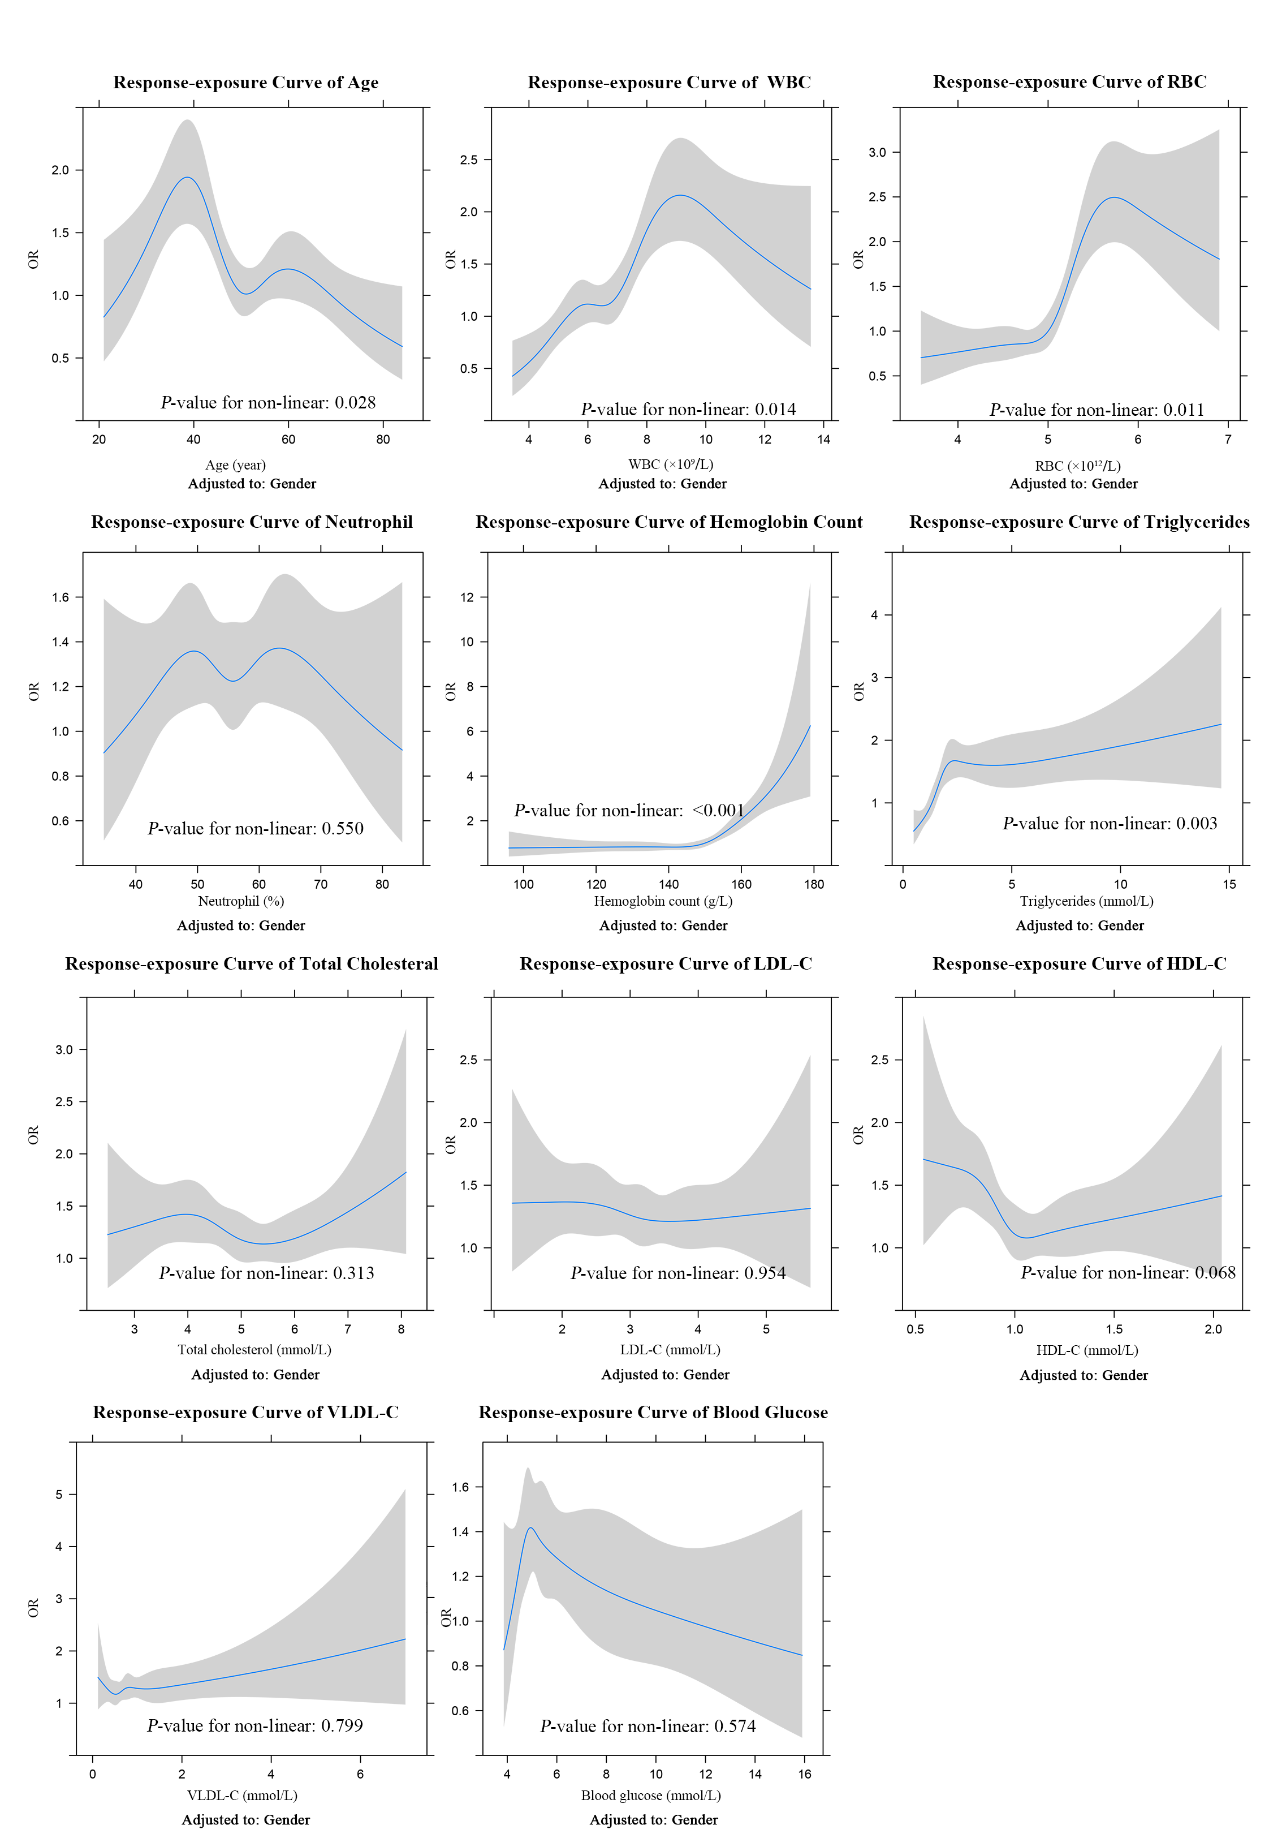


e Figure 2. The exposure-response curve for all continuous variables. The restricted cubic spline is used to put the variable of interest into the model adjusted to gender. The *P*-value refers to the *P*-value of the non-linear term for variable of interest in the model. WBC , white blood cell count; RBC , red blood cell count; HDL-C , high density lipoprotein cholesterol; LDL-C , low density lipoprotein cholesterol; VLDL-C , very low density lipoprotein cholesterol.


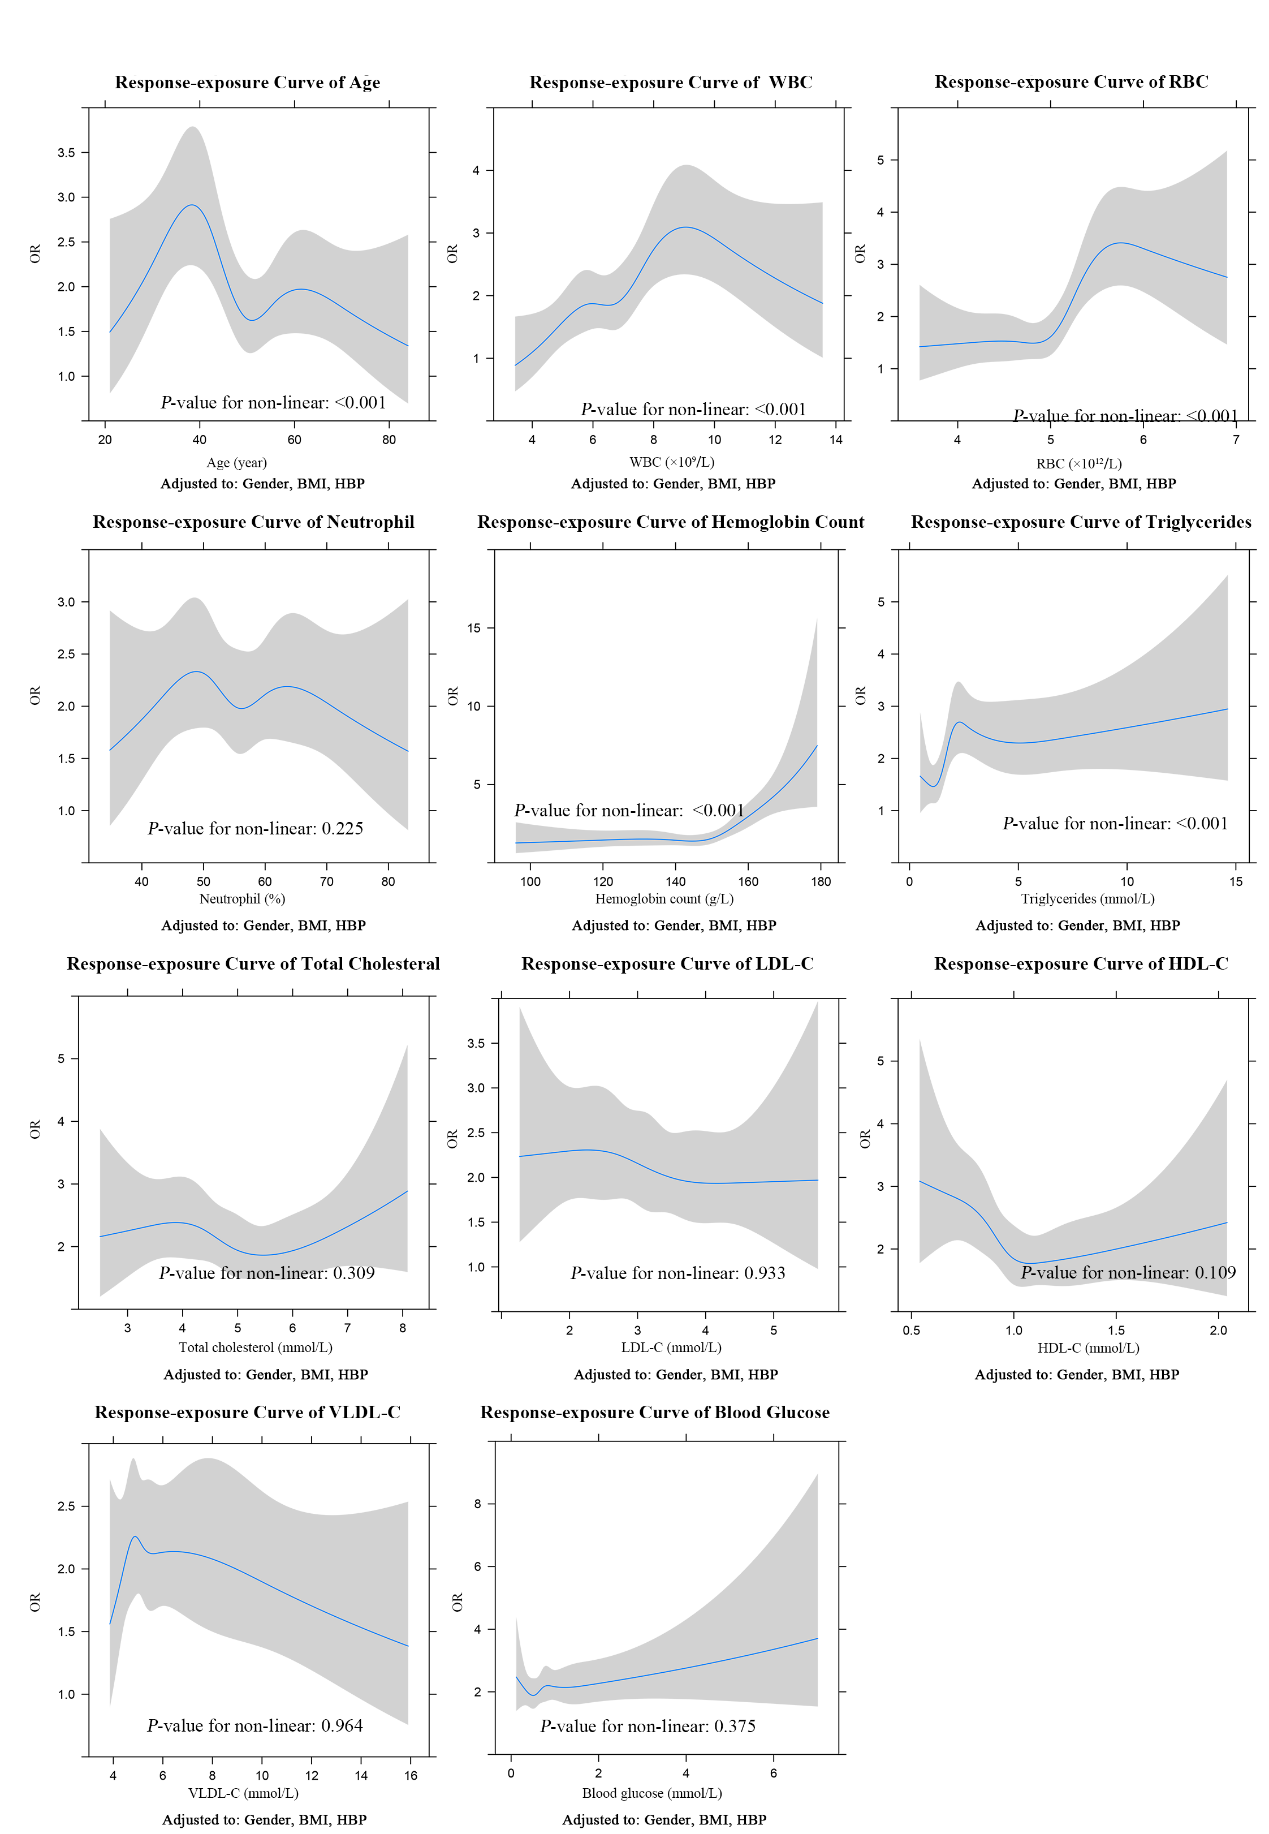


e Figure 3. The exposure-response curve for all continuous variables. The restricted cubic spline is used to put the variable of interest into the model adjusted to gender, BMI, HBP. The *P*-value refers to the *P*-value of the non-linear term for variable of interest in the model. WBC , white blood cell count; RBC , red blood cell count; HDL-C , high density lipoprotein cholesterol; LDL-C , low density lipoprotein cholesterol; VLDL-C , very low density lipoprotein cholesterol.


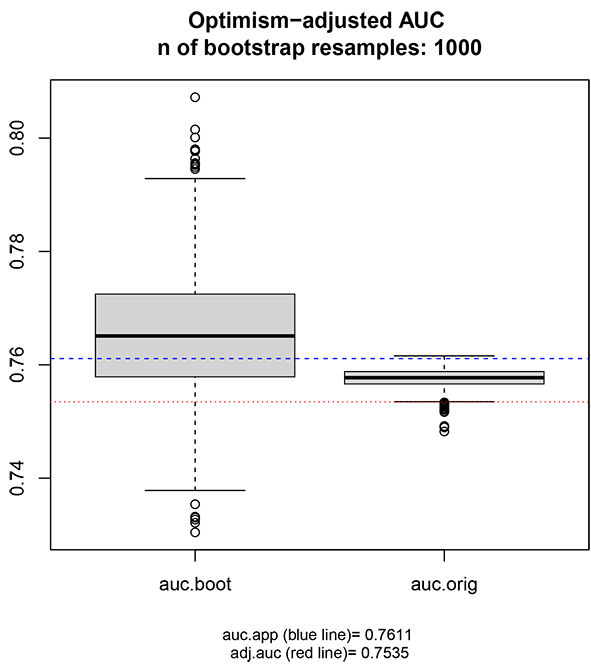


e Figure 4. The optimism-corrected AUC for development dataset. AUC , Area Under Receiver Operating Characteristic Curve.


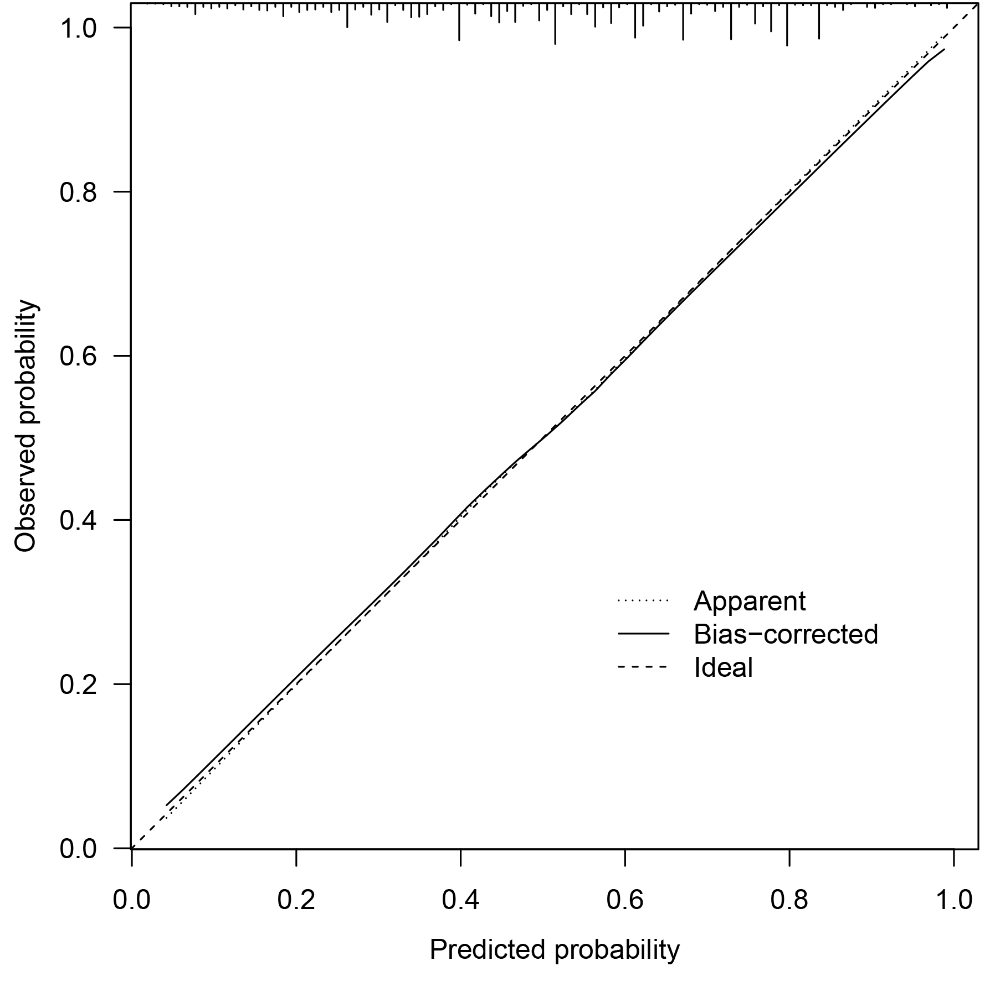


e Figure 5. Calibration for development dataset


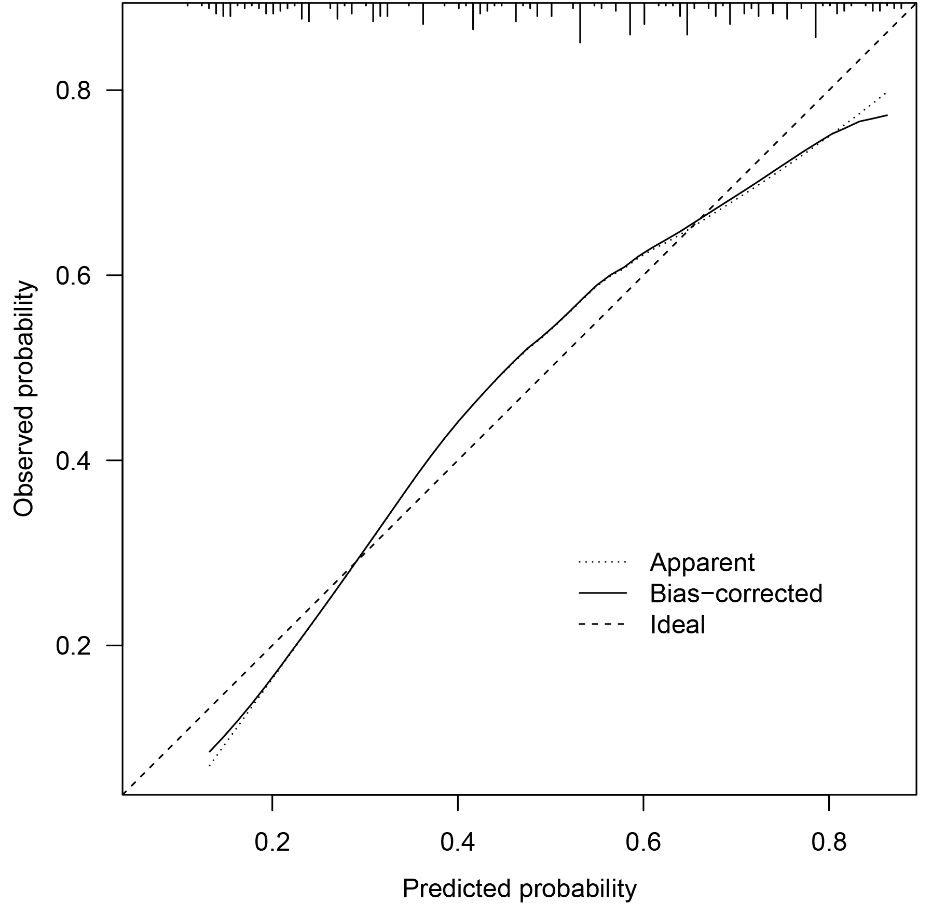


e Figure 6. Calibration for temporal validation dataset


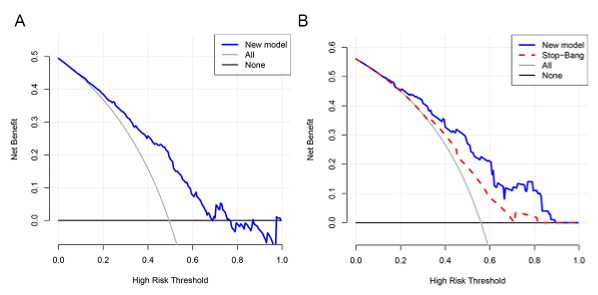


e Figure 7. The DCA for the new model and two questionaires. A, Decision curve analysis (DCA) for the new model based on the temporal validation dataset. B, DCA of new model and STOP-Bang based on the dataset of patients with STOP-Bang information.

| ***e Table 1 Generalized variance inflation factors for full modelss*** | | | | |
| --- | --- | --- | --- | --- |
| Variable | Step 1 | | Step 2 | |
| GVIF[1/(2×*df*)] | df | GVIF[1/(2×*df*)] | df |
| Gender | 1.16 | 1 | 1.16 | 1 |
| Age | 1.03 | 4 | 1.03 | 4 |
| BMI | 1.02 | 3 | 1.02 | 3 |
| HBP | 1.02 | 2 | 1.02 | 2 |
| Smoking | 1.03 | 1 | 1.03 | 1 |
| Snore | 1.31 | 1 | 1.31 | 1 |
| Choke | 1.24 | 1 | 1.24 | 1 |
| Sleepy | 1.22 | 1 | 1.22 | 1 |
| Apnea | 1.01 | 1 | 1.01 | 1 |
| WBC | 1.04 | 2 | 1.04 | 2 |
| RBC | 1.15 | 2 | 1.15 | 2 |
| Neut | 1.09 | 1 | 1.09 | 1 |
| Hb | 1.18 | 2 | 1.18 | 2 |
| TG | 1.05 | 1 | 1.05 | 1 |
| TC | 2.60 | 1 | - | - |
| LDL-C | 2.41 | 1 | 1.02 | 1 |
| HDL-C | 1.11 | 1 | 1.02 | 1 |
| VLDL-C | 1.20 | 1 | 1.01 | 1 |
| B_sugar | 1.04 | 1 | 1.03 | 1 |

Abbreviations: GVIF, generalized variance inflation factor; HBP, high blood pressure; WBC , white blood cells; RBC, red blood cells; Neut , neutrophil; Hb , haemoglobin; TG , triglycerides; TC , total cholesterol. See Table 1 legend for expansion of the abbreviation.

Total cholesterol, being the variable with the largest GVIF[1/(2×df)] at step 1, was excluded.

| ***e Table 2 Comparison of prediction performance between severe OSA clinical predictive model and STOP-Bang with similar specificity*** | | | | | | |
| --- | --- | --- | --- | --- | --- | --- |
| Model characteristics | Stop Bang threshold | Specificity (%)  (95% CI） | p value of McNemar χ2 test of specificity | Sensitivity (%)  (95% CI） | p value of McNemar χ2 test of sensitivity | Accuracy (%) (95% CI） |
| Stop Bang | 1 | 0.00 (0.00-8.04) | 1.000 | 100.00 (93.62-100.00) | 1.000 | 56.00 (45.72-65.92) |
| The New Model b | - | 2.27 (0.06-12.02) | 100.00 (93.62-100.00) | 57.00 (46.71-66.86) |
| Stop Bang a | 2 | 25.00 (13.19-40.34) | 1.000 | 92.86 (82.71-98.02) | 0.371 | 63.00 (52.76-72.44) |
| The New Model b | - | 25.00 (13.19-40.34) | 98.21 (90.45-99.95) | 66.00 (55.85-75.18) |
| Stop Bang | 3 | 52.27 (36.69-67.54) | 1.000 | 71.43 (57.79-82.70) | 0.027 | 63.00 (52.76-72.44) |
| The New Model b | - | 52.27 (36.69-67.54) | 87.50 (75.93-94.82) | 72.00 (62.13-80.52) |
| Stop Bang | 4 | 79.55 (64.70-90.20) | 1.000 | 39.29 (26.50-53.25) | 0.045 | 57.00 (46.71-66.86) |
| The New Model b | - | 79.55 (64.70-90.20) | 60.71 (46.75-73.50) | 69.00 (58.97-77.87) |
| Stop Bang | 5 | 97.73 (87.98-99.94) | 1.000 | 10.71 (4.03-21.88) | 0.024 | 49.00 (38.86-59.20) |
| The New Model b | - | 97.73 (87.98-99.94) | 28.57 (17.30-42.21) | 59.00 (48.71-68.74) |

The predictive performance of Stop Bang with five different thresholds are shown here. If one patient’s Stop Bang score is greater than or equal to the Stop Bang threshold, i.e. from 1 to 5, he/she will be diagnosed with severe OSA.

a The threshold of Stop Bang selected here has the largest Youden Index among all alternative thresholds as Table 4.

b The performance of the new model for Patients in Stop Bang group is based on the threshold with the specificity which is larger than or equal to the specificity of different thresholds of Stop Bang and comes closest to it. So it can make sure the threshold of our model selected here will have the best sensitivity in such situation.
